# Supplementary material
Source: PubMed Central journal article supplement (PMC11018345)
Supplement: NIHMS1938138-supplement-2.pdf [file NIHMS1938138-supplement-2.pdf]

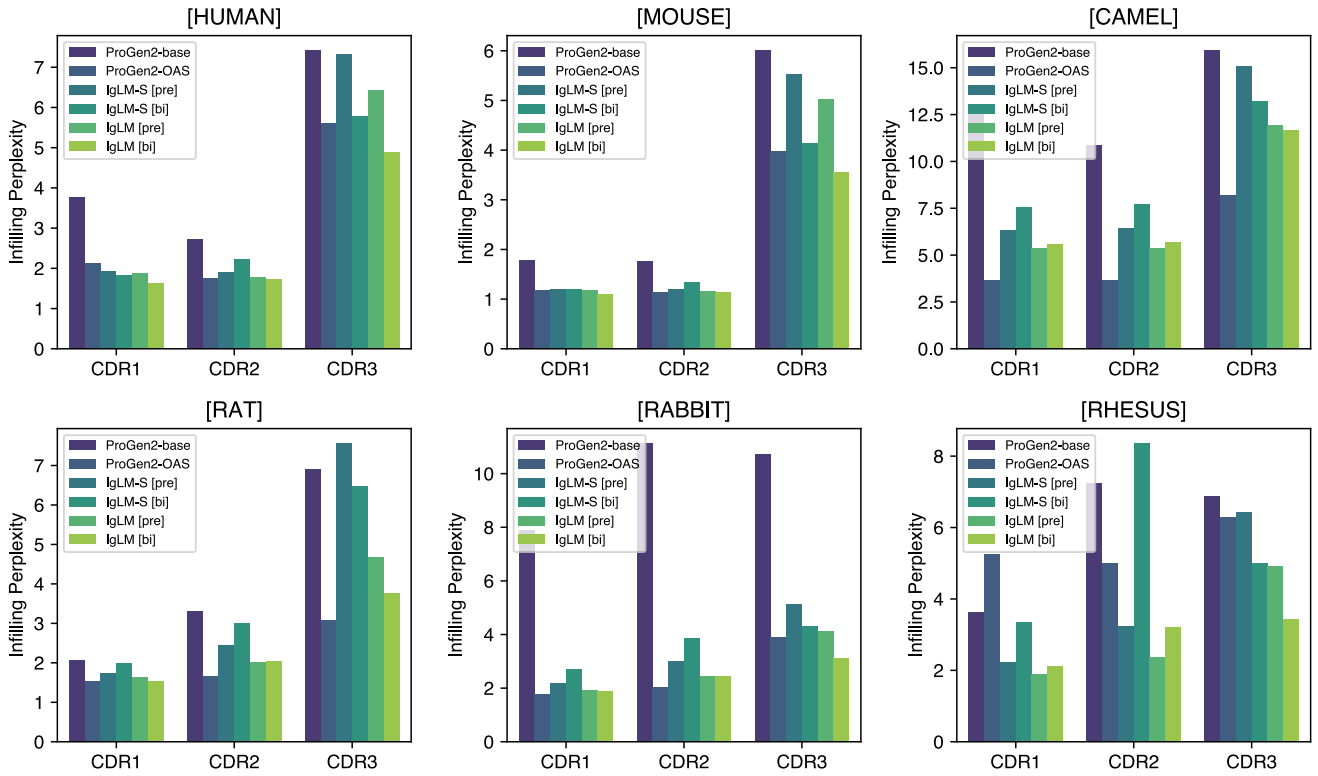

**Fig. S1.** Infilling perplexity for IgLM and ProGen2 models on heldout test dataset of 30M sequences, divided by species-of-origin. Perplexity values for IgLM models are reported with preceding and bidirectional (infilling) context. Confidence intervals calculated from bootstrapping (100 samples) had a width less than 0.2 and are therefore not shown.

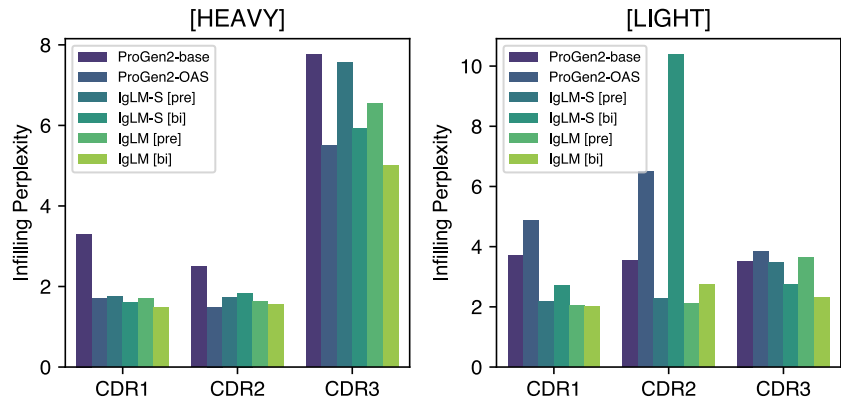

**Fig. S2.** Infilling perplexity for IgLM and ProGen2 models on heldout test dataset of 30M sequences, divided by chain type. Perplexity values for IgLM models are reported with preceding and bidirectional (infilling) context. Confidence intervals calculated from bootstrapping (100 samples) had a width less than 0.02 and are therefore not shown.

Generated sequences

Germline

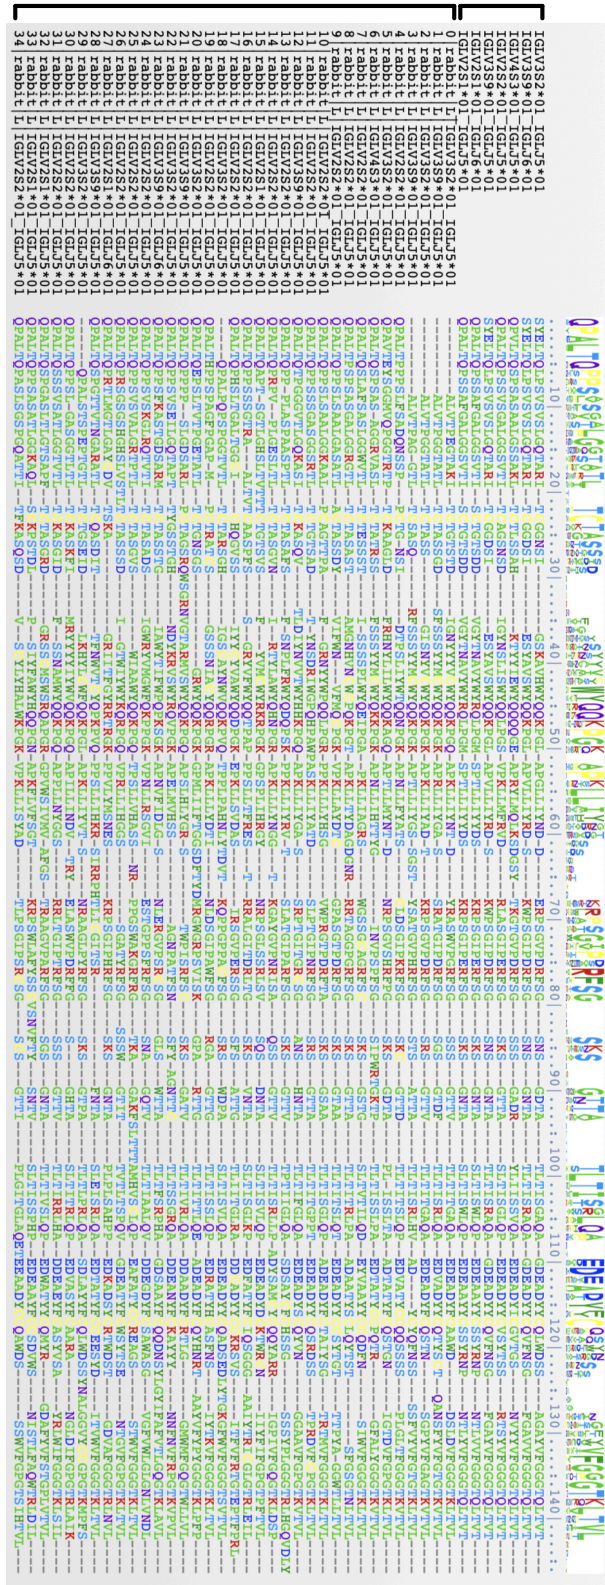

Fig. S3. Alignment of generated rabbit light chain sequences with the closest germline sequences assigned by ANARCI. Sequences were aligned with Clustal-Omega.

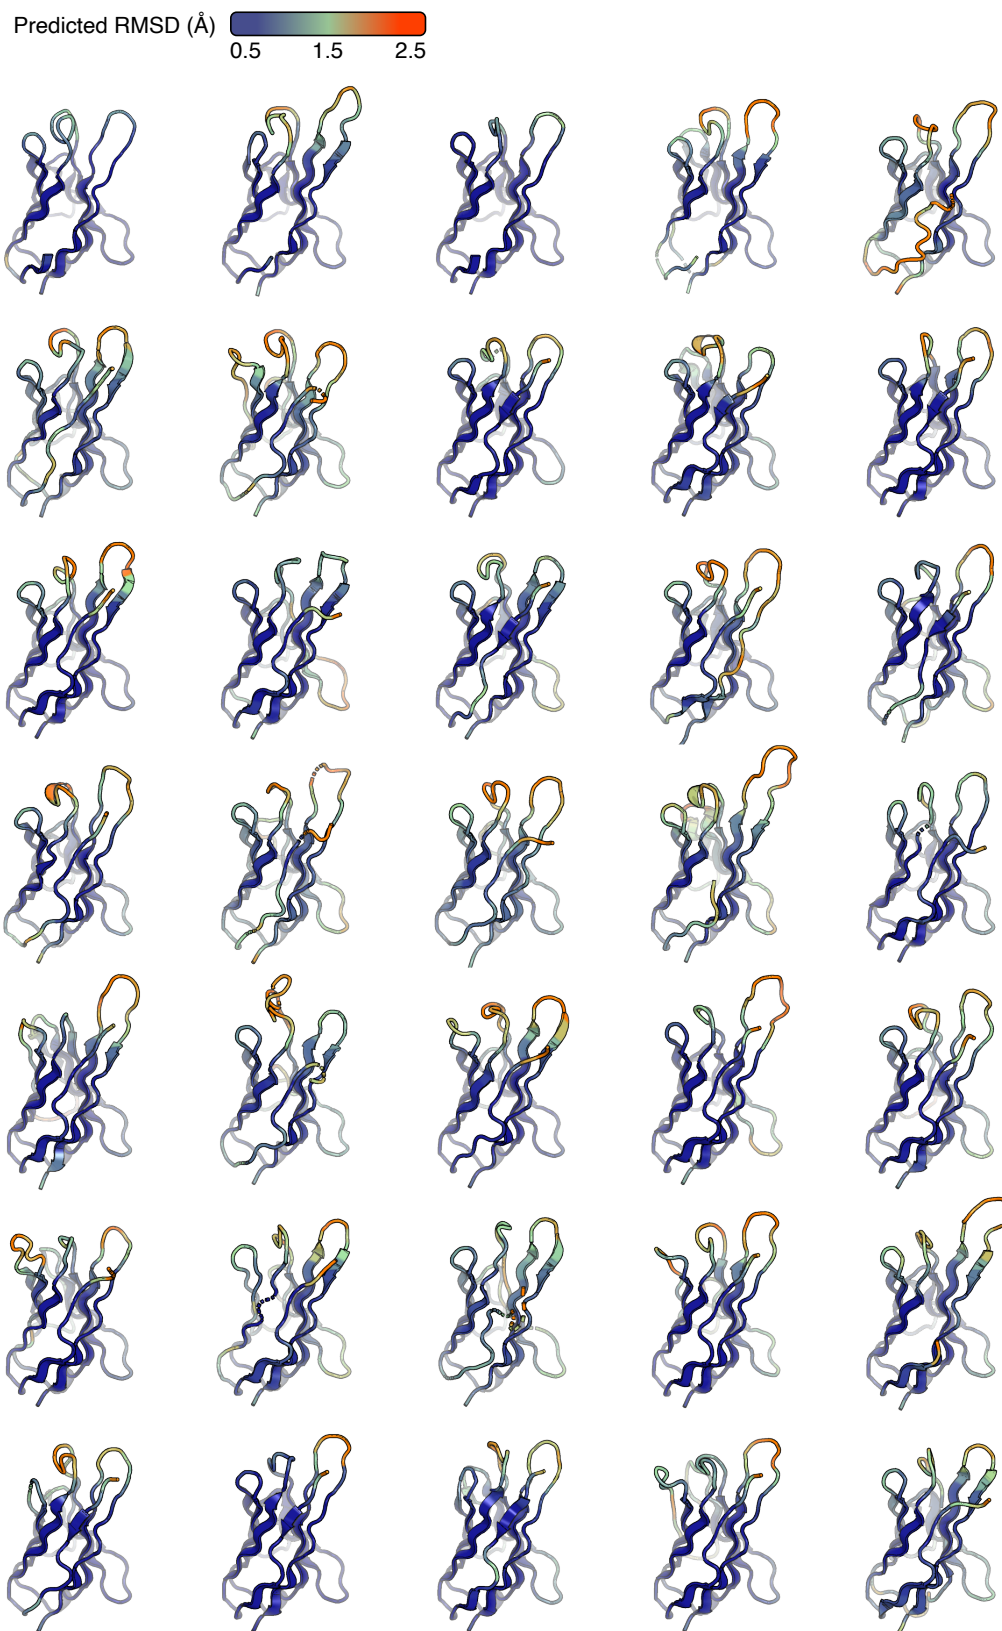

**Fig. S4.** Prediction of generated rabbit light chain sequences by IgFold. Structures are colored by predicted RMSD.

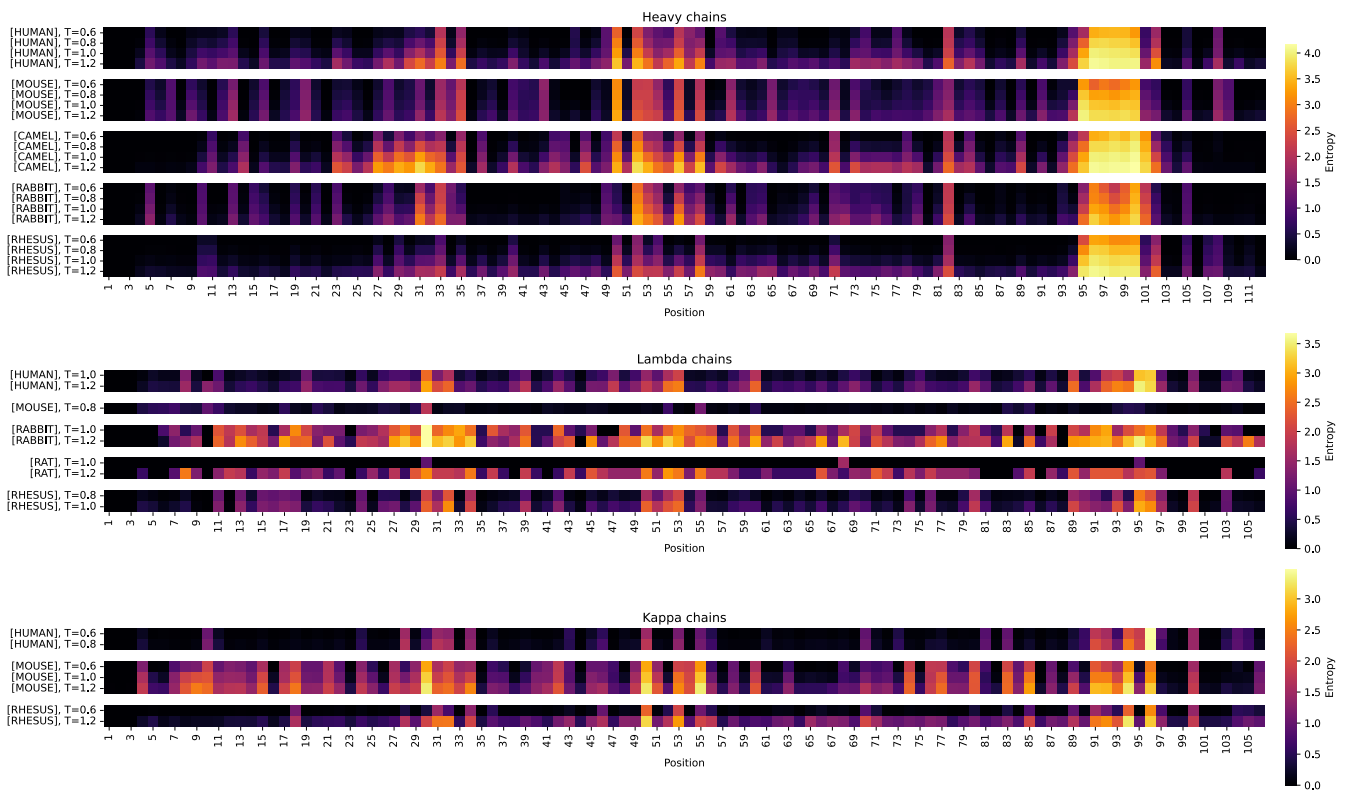

**Fig. S5.** Entropy of generated full-length sequences at Chothia numbered positions. Residues at insertion points in the numbering scheme are aggregated with the prior non-insertion residue. With increasing temperature, generated sequences acquire additional mutations and correspondingly higher positional entropy.

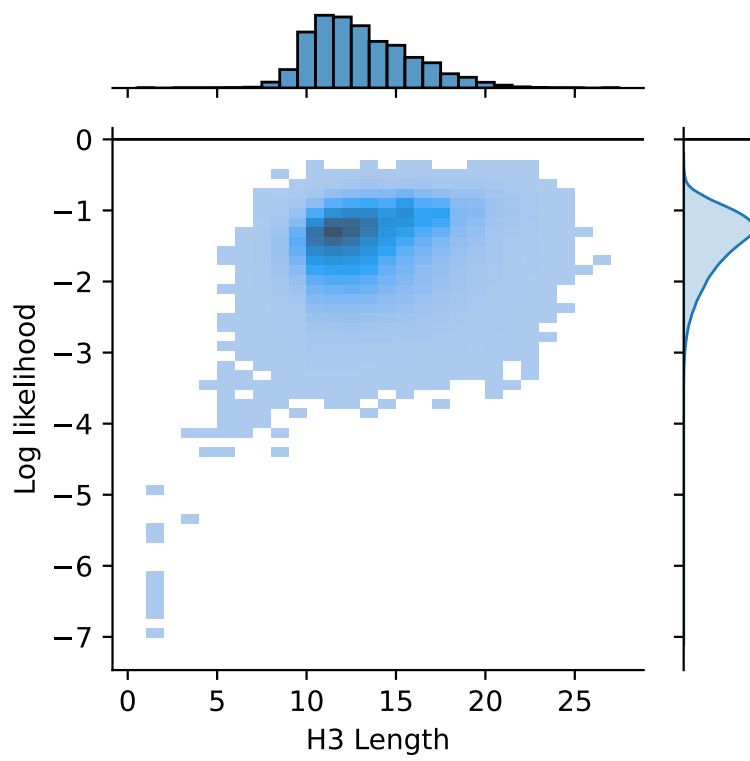

**Fig. S6.** Comparison of infilled CDR H3 loop length and infilling log likelihood from IgLM.

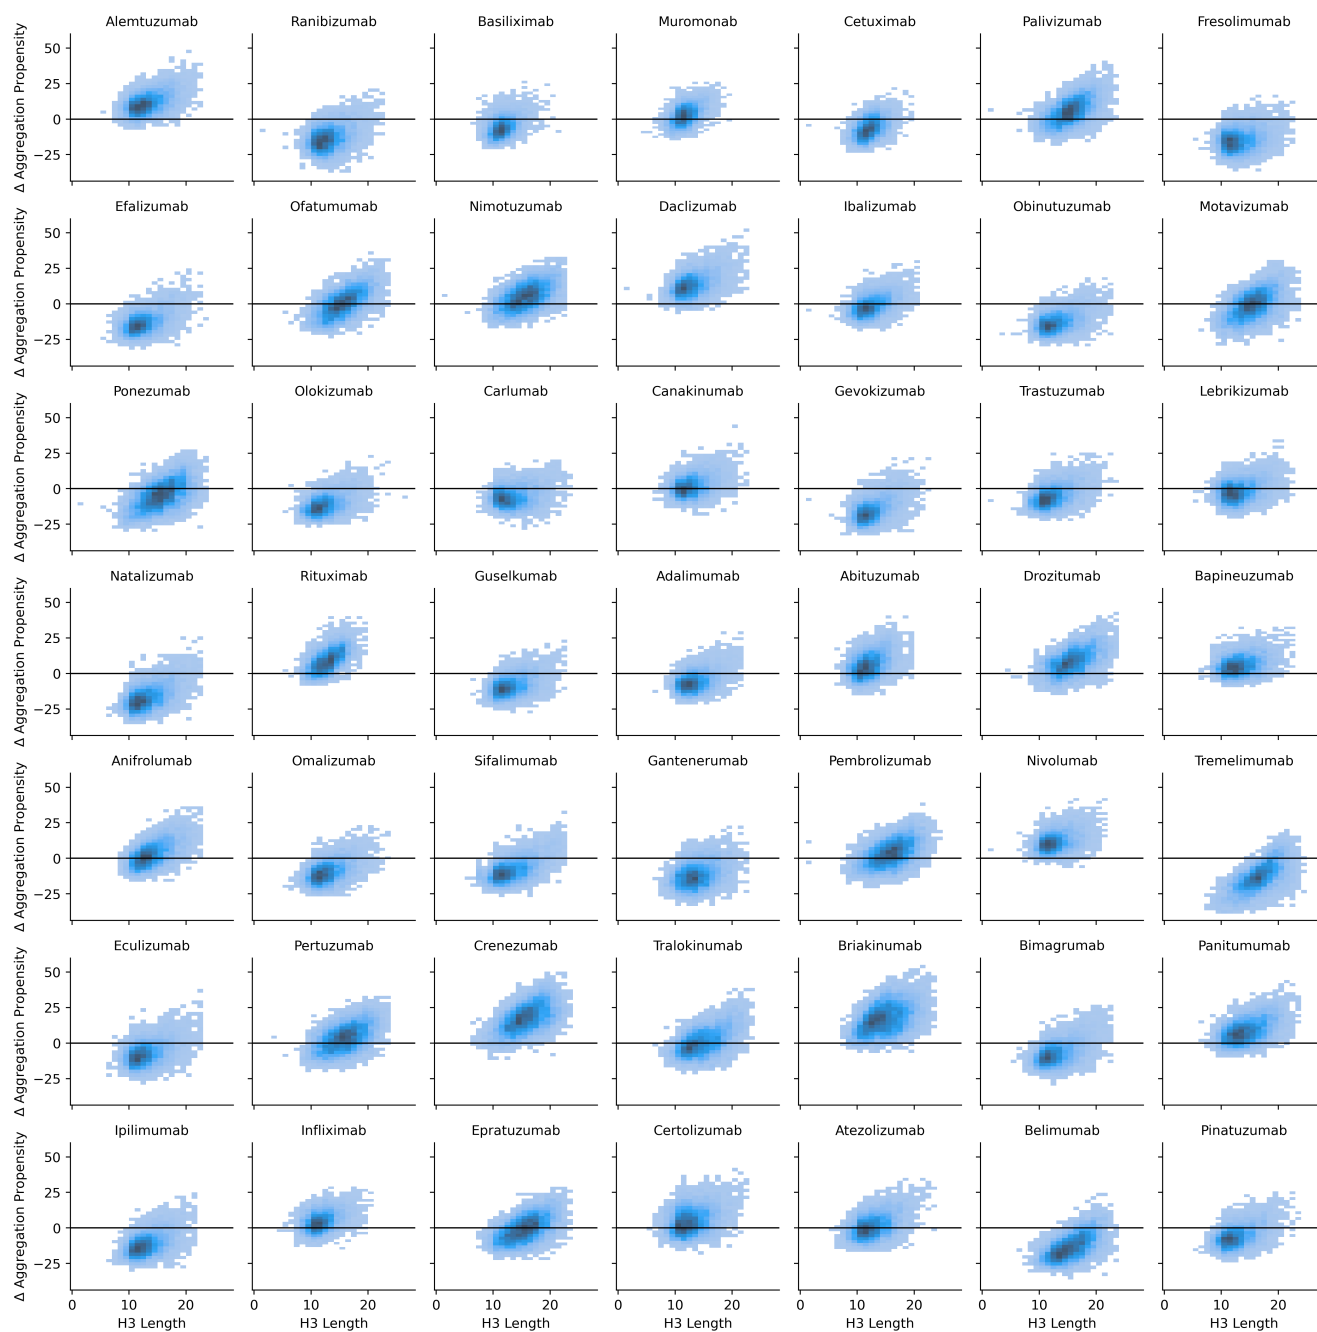

**Fig. S7.** Comparison of infilled CDR H3 loop length and change in aggregation propensity (relative to parent, lower is better) for individual infilled libraries.

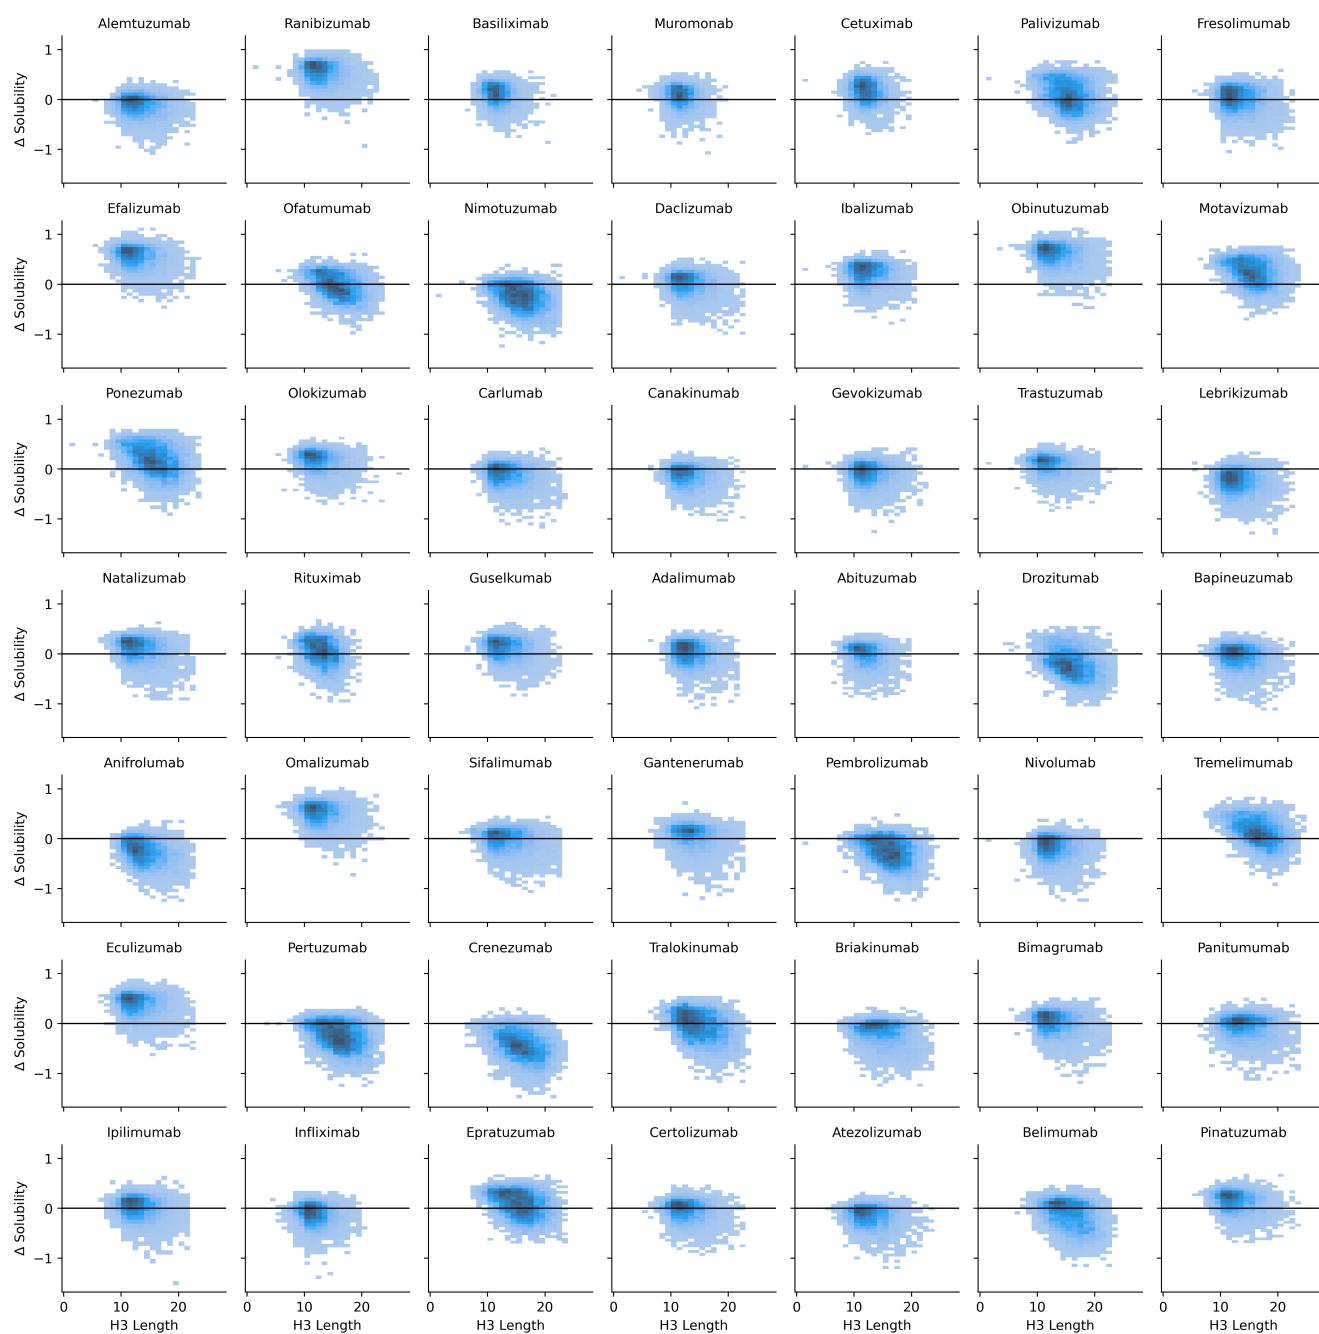

**Fig. S8.** Comparison of infilled CDR H3 loop length and change in solubility (relative to parent, higher is better) for individual infilled libraries.

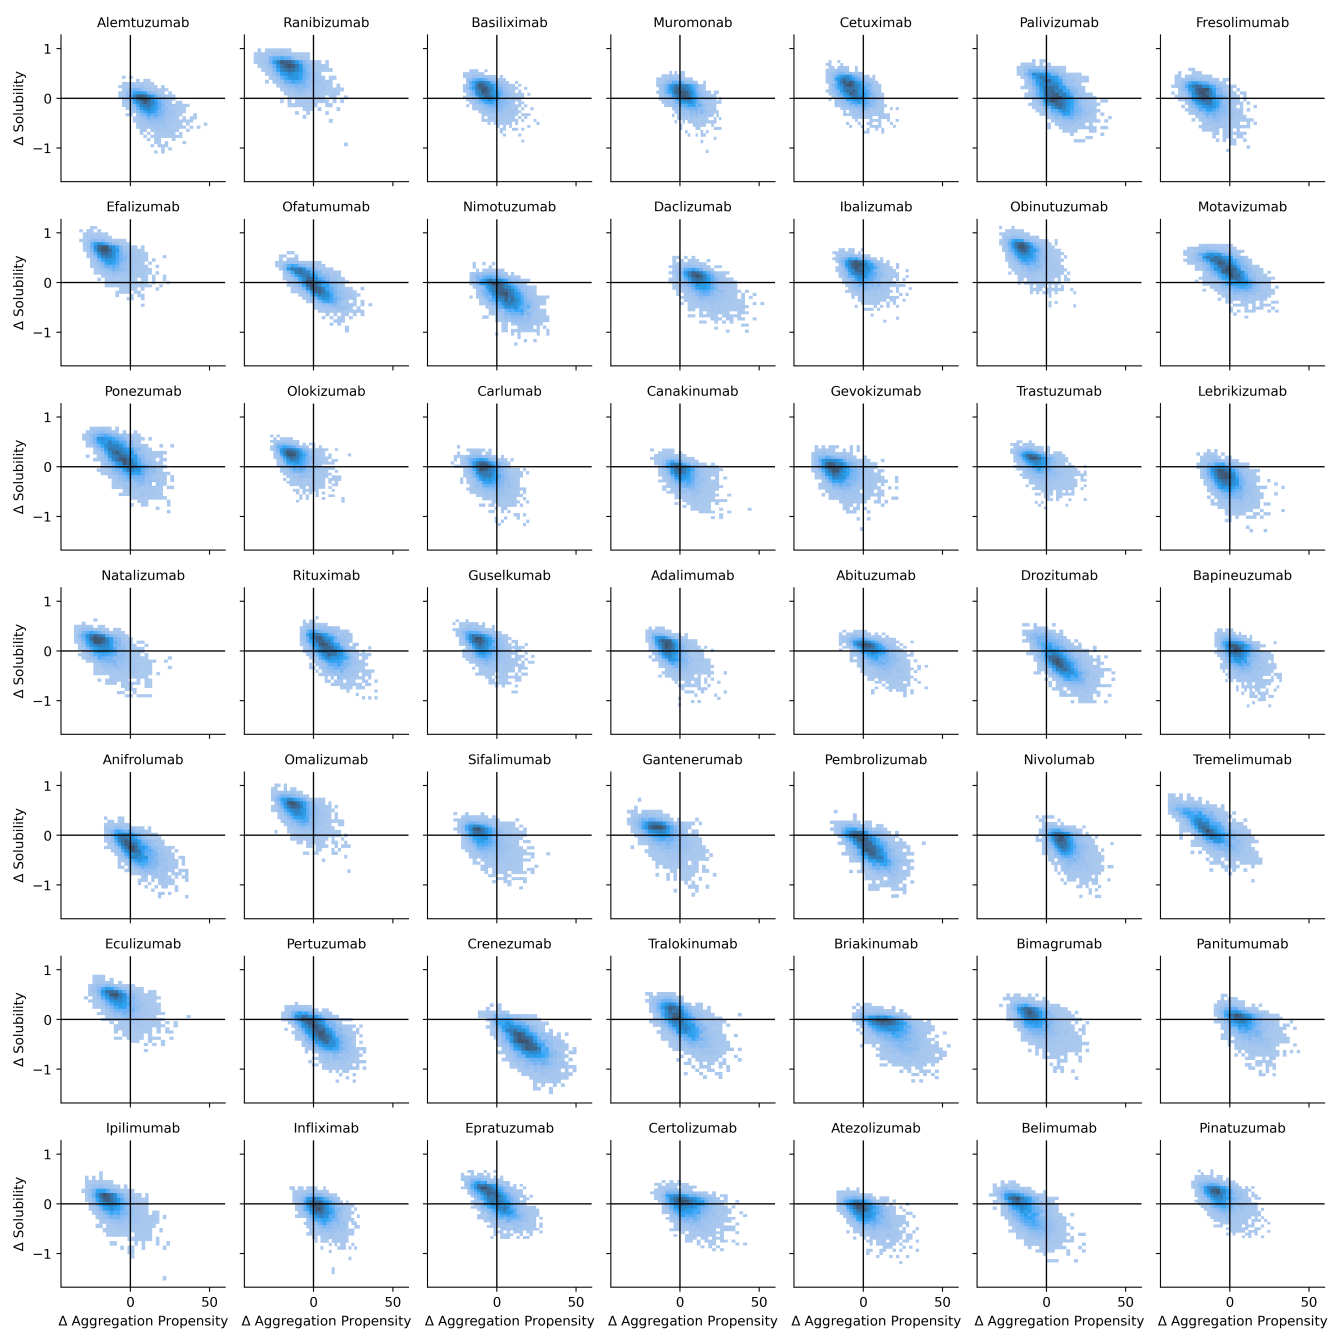

**Fig. S9.** Relationship between changes in aggregation propensity and solubility for individual infilled libraries.



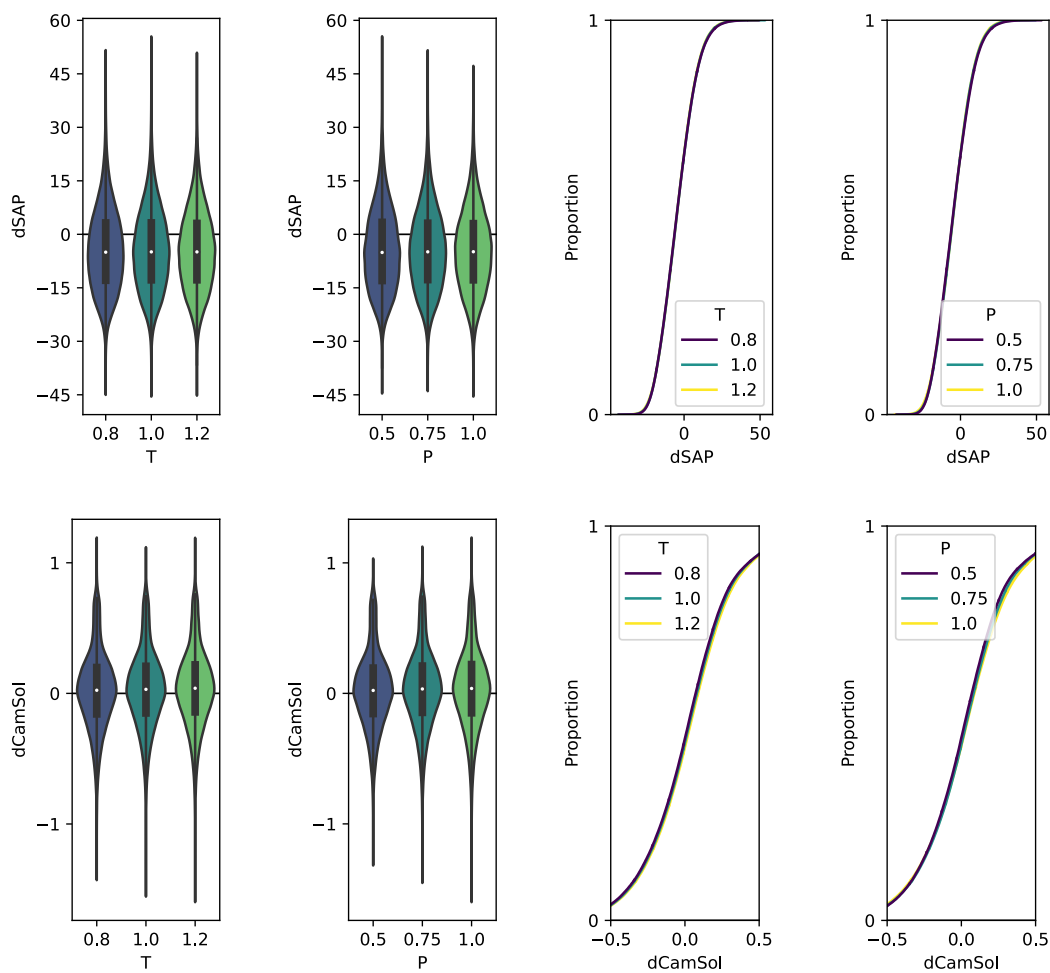

**Fig. S10.** Impact of sampling parameters on developability of infilled libraries. Library properties are largely unaffected by choice of sampling temperature ( $T$ ) and nucleus sampling probability ( $P$ ).

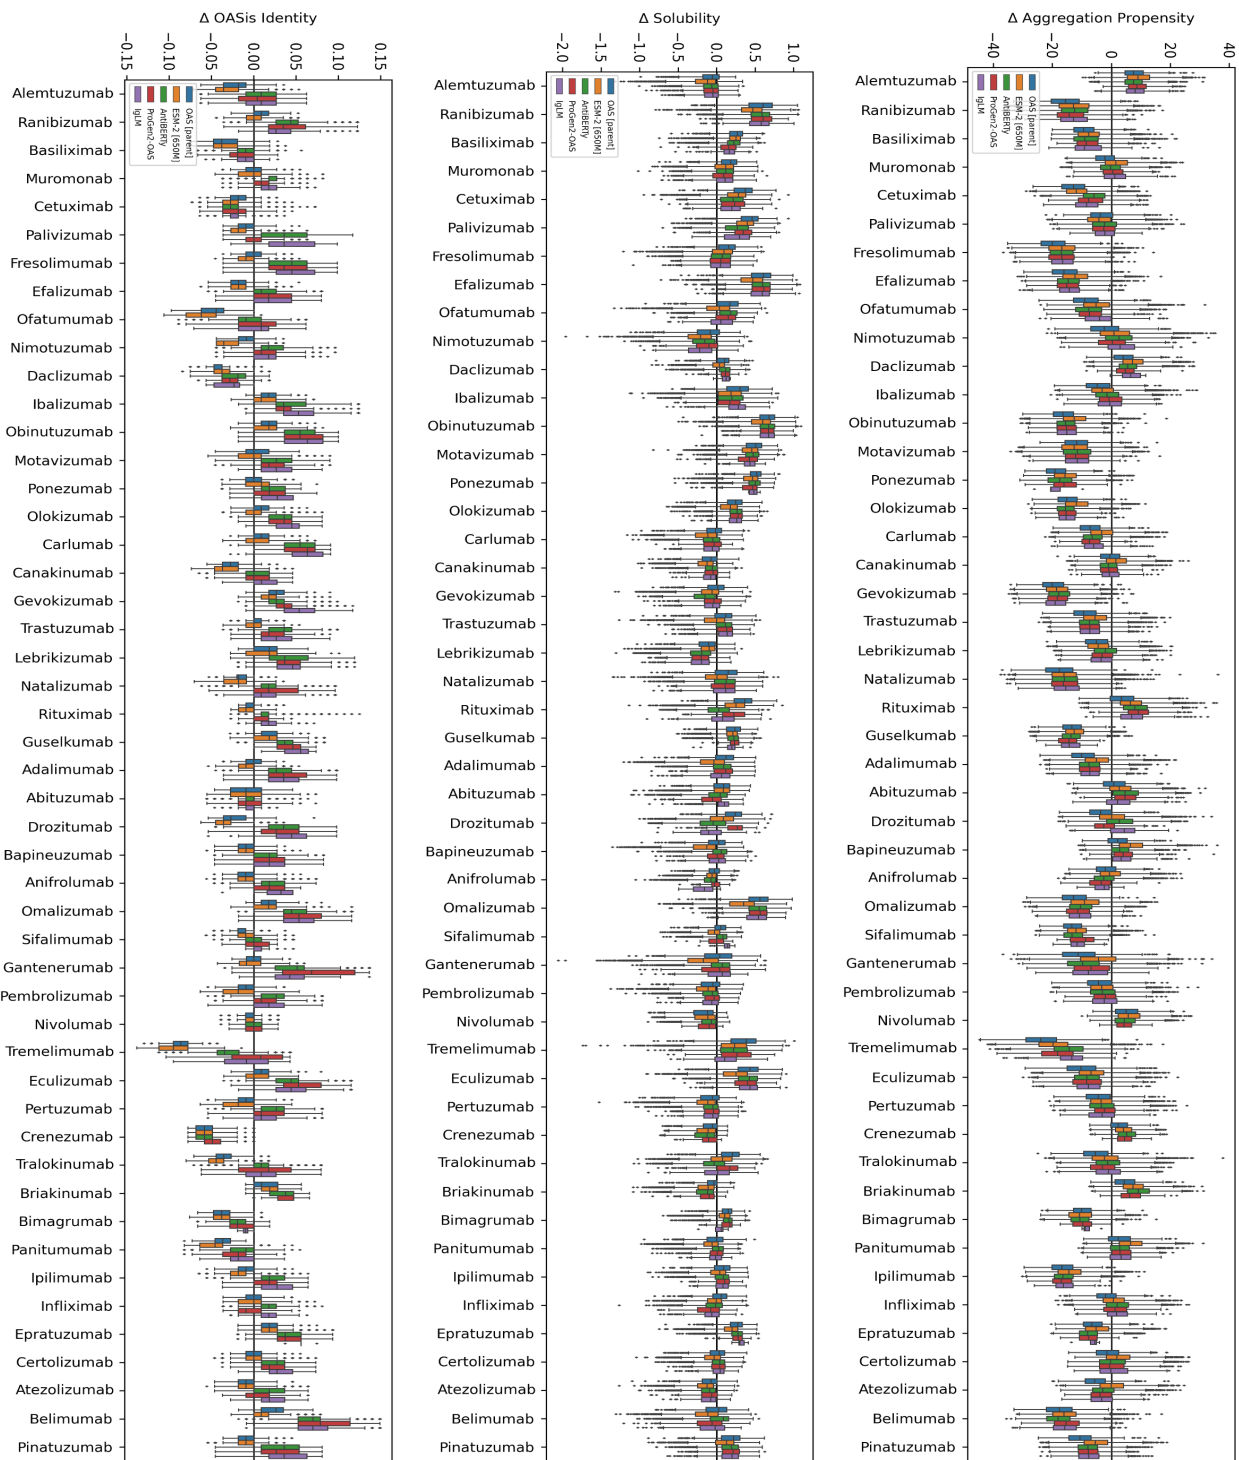

**Fig. S11.** Comparison of infilled CDR H3 loop developability using IgLM, OAS sequence baselines, and alternative language models. OAS [parent] and OAS[natural] sequences were generated according to positional amino acid frequencies for natural loops matching the parent antibody length and the natural CDR H3 loop distributions, respectively. Sequences for ESM-2 [650M] and AntiBERTy were generated by sampling from masked language modeling likelihoods. ProGen2-OAS loops were generated using preceding context followed by back-mutation of the C-terminal residues to the parent sequence. Only sequences matching the parent loop length were used for autoregressive models to remove length-dependent effects on developability. Structures for all infilled sequences were predicted with IgFold to support computation of developability measurements.

**Table S1.** Distribution of sequences in clustered OAS dataset.

| Species      | Heavy Chains       | Light Chains      | Total              |
|--------------|--------------------|-------------------|--------------------|
| Human        | 412,807,447        | 70,584,881        | 483,392,328        |
| Mouse        | 93,360,086         | 3,198,407         | 96,558,493         |
| Camel        | 1,091,641          | -                 | 1,091,641          |
| Rat          | 3,700,086          | 0                 | 3,700,086          |
| Rabbit       | 2,644,903          | 0                 | 2,644,903          |
| Rhesus       | 381,021            | 719,674           | 1,100,695          |
| <b>Total</b> | <b>513,985,184</b> | <b>74,502,962</b> | <b>588,488,146</b> |

**Table S2.** Full-length sequence generation parameters.

| Description                 | Chain token | Species token | Initial residues | Number generated |
|-----------------------------|-------------|---------------|------------------|------------------|
| Human heavy chain           | [HEAVY]     | [HUMAN]       | EVQ              | 20,000           |
| Human light chain (lambda)  | [LIGHT]     | [HUMAN]       | QSA              | 10,000           |
| Human light chain (kappa)   | [LIGHT]     | [HUMAN]       | DIQ              | 10,000           |
| Mouse heavy chain           | [HEAVY]     | [MOUSE]       | QVQ              | 20,000           |
| Mouse light chain (lambda)  | [LIGHT]     | [MOUSE]       | QAV              | 10,000           |
| Mouse light chain (kappa)   | [LIGHT]     | [MOUSE]       | DIV              | 10,000           |
| Camel heavy chain           | [HEAVY]     | [CAMEL]       | QVQ              | 20,000           |
| Rabbit heavy chain          | [HEAVY]     | [RABBIT]      | QEQ              | 20,000           |
| Rabbit light chain (lambda) | [LIGHT]     | [RABBIT]      | QPA              | 10,000           |
| Rabbit light chain (kappa)  | [LIGHT]     | [RABBIT]      | ALV              | 10,000           |
| Rat heavy chain             | [HEAVY]     | [RAT]         | EVQ              | 20,000           |
| Rat light chain (lambda)    | [LIGHT]     | [RAT]         | QAV              | 10,000           |
| Rat light chain (kappa)     | [LIGHT]     | [RAT]         | GIQ              | 10,000           |
| Rhesus heavy chain          | [HEAVY]     | [RHESUS]      | QVQ              | 20,000           |
| Rhesus light chain (lambda) | [LIGHT]     | [RHESUS]      | QSV              | 10,000           |
| Rhesus light chain (kappa)  | [LIGHT]     | [RHESUS]      | AIQ              | 10,000           |
| <b>Total</b>                |             |               |                  | <b>220,000</b>   |

**Table S3.** Adherence to species conditioning tags for full-length generation. Percentage of matches between conditioning tag used for generation and species classification from ANARCI for each generation configuration.

| Chain token | Species token | T = 0.6 | T = 0.8 | T = 1.0 | T = 1.2 | Overall |
|-------------|---------------|---------|---------|---------|---------|---------|
| [HEAVY]     | [HUMAN]       | 99.98%  | 99.94%  | 99.66%  | 99.30%  | 99.72%  |
| [HEAVY]     | [MOUSE]       | 99.94%  | 99.34%  | 98.32%  | 96.62%  | 98.55%  |
| [HEAVY]     | [CAMEL]       | 98.36%  | 97.72%  | 96.76%  | 92.72%  | 96.39%  |
| [HEAVY]     | [RABBIT]      | 100.00% | 100.00% | 99.96%  | 99.98%  | 99.98%  |
| [HEAVY]     | [RAT]         | 0.00%   | 0.00%   | 0.00%   | 0.00%   | 0.00%   |
| [HEAVY]     | [RHESUS]      | 99.00%  | 94.82%  | 87.14%  | 71.58%  | 88.14%  |
| [LIGHT]     | [HUMAN]       | 100.00% | 99.98%  | 99.92%  | 99.40%  | 99.82%  |
| [LIGHT]     | [MOUSE]       | 13.84%  | 86.62%  | 16.64%  | 22.46%  | 34.89%  |
| [LIGHT]     | [RABBIT]      | 14.56%  | 5.84%   | 1.37%   | 2.22%   | 6.89%   |
| [LIGHT]     | [RAT]         | 0.00%   | 0.00%   | 0.02%   | 0.15%   | 0.04%   |
| [LIGHT]     | [RHESUS]      | 70.14%  | 49.02%  | 44.80%  | 51.15%  | 54.03%  |
